# Supplementary material
Source: PubMed Central journal article supplement (PMC3013029)
Supplement: supp_M110.146324_jbc.M110.146324-1.pdf [file supp_M110.146324_jbc.M110.146324-1.pdf]

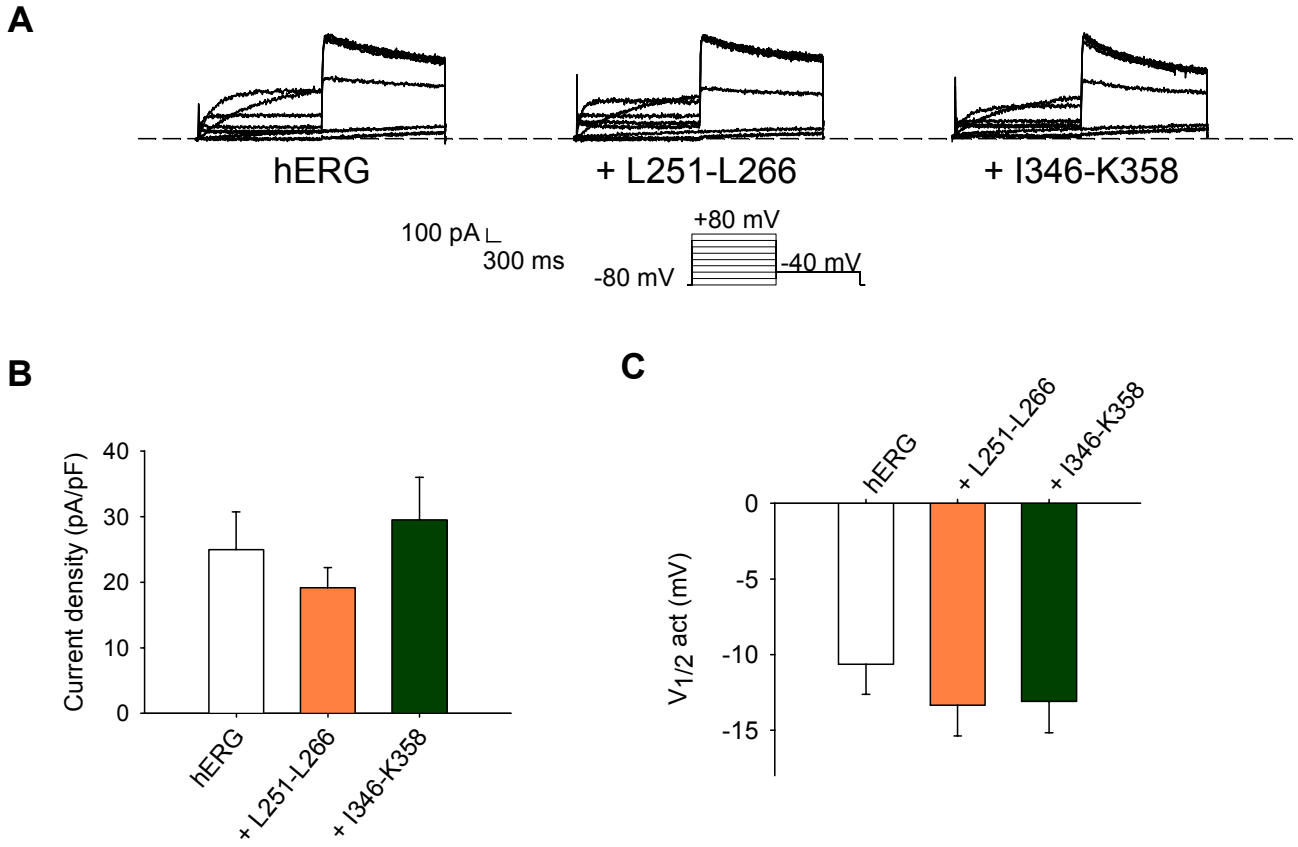

Supplementary figure. Specificity of peptides effects on KCNQ1. A, representative whole-cell recordings of WT hERG current in the absence (hERG) and in the presence of S4S5<sub>L</sub> (+ L251-L266) or S6T peptide (+ I346-K358). Inset: voltage protocol, one epoch every 6 s. B, C, hERG tail current density at -40 mV after a prepulse at +80 mV (B), half activation potential (C) in the same conditions (n = 14-22).
